# Supplementary material for: Transcriptional profiling reveals molecular signatures associated with HIV permissiveness in Th1Th17 cells and identifies Peroxisome Proliferator-Activated Receptor Gamma as an intrinsic negative regulator of viral replication
Source: PubMed Central journal article supplement (PMC3898812; doi:10.1186/1742-4690-10-160), 2013-12-21

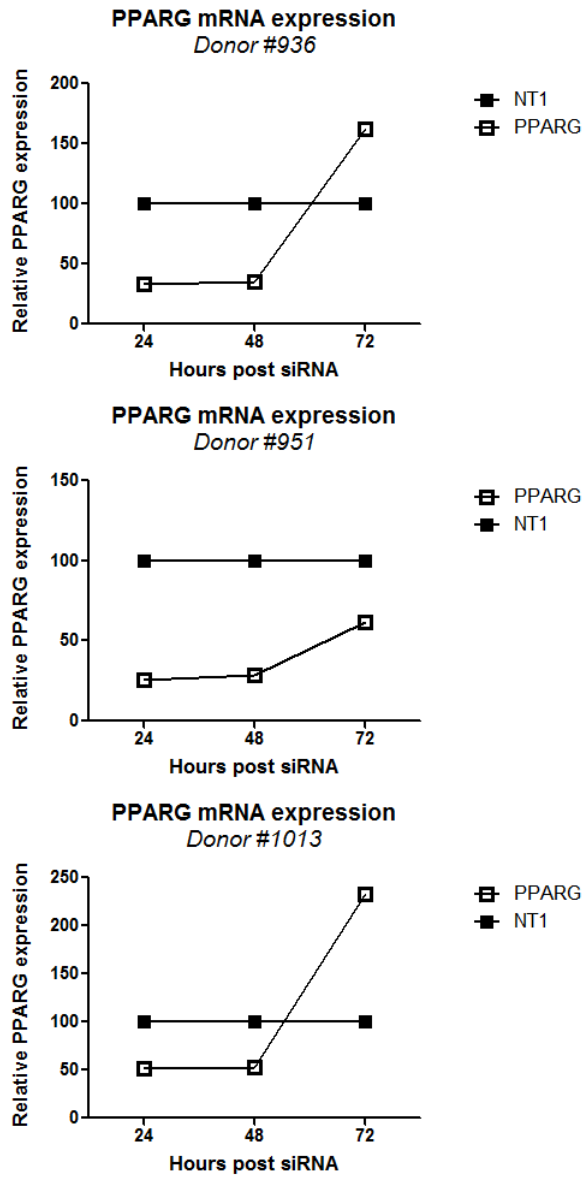

Supplement: 1742-4690-10-160-S7.pdf [file 1742-4690-10-160-S7.pdf]
